# Supplementary material for: Adoption, implementation and sustainability of school-based physical activity and sedentary behaviour interventions in real-world settings: a systematic review
Source: Int J Behav Nutr Phys Act. 2019 Dec 2;16:120. doi: 10.1186/s12966-019-0876-4 (PMC6889569; doi:10.1186/s12966-019-0876-4)
Supplement: Supplementary file 6 — Additional file 6. MMAT risk of bias tool. [file 12966_2019_876_MOESM6_ESM.xlsx]

## Sheet: Sheet1
	SCREENING QUESTIONS		QUALITATIVE STUDIES					QUANTITATIVE DESCRIPTIVE STUDIES					MIXED METHODS STUDIES
Intervention	Are there clear research questions?	Do the collected data allow to address the research questions?	Is the qualitative approach appropriate to answer the research question?	Are the qualitative data collection methods adequate to address the research question?	Are the findings adequately derived from the data?	Is the interpretation of results sufficiently substantiated by data?	Is there coherence between qualitative data sources, collection, analysis and interpretation?	Is the sampling strategy relevant to address the research question?	Is the sample representative of the target population?	Are the measurements appropriate?	Is the risk of nonresponse bias low?	Is the statistical analysis appropriate to answer the research question?	Is there an adequate rationale for using a mixed methods design to address the research question?	Are the different components of the study effectively integrated to answer the research question?	Are the outputs of the integration of qualitative and quantitative components adequately interpreted?	Are divergences and inconsistencies between quantitative and qualitative results adequately addressed?	Do the different components of the study adhere to the quality criteria of each tradition of the methods involved?
MIXED METHODS STUDIES
DOiT	Yes	Yes	Yes	Yes	Yes	Yes	Yes	Yes	Yes	Yes	Yes	Yes	Yes	Yes	Yes	Yes	Yes
Svendborg project	Yes	Yes	Yes	Yes	Yes	Yes	Yes	Yes	Yes	Yes	Yes	Yes	Yes	Yes	Yes	Yes	Yes
Jump-in!	Yes	Yes	Yes	Can't tell	Yes	Yes	Yes	Yes	Yes	Yes	Can't tell	Yes	Yes	Yes	Yes	Yes	Yes
Lifestyle education for activity program (LEAP)	Yes	Yes	Yes	Yes	Yes	Yes	Yes	Yes	Yes	Can't tell	Yes	Yes	Can't tell	Yes	Yes	Yes	Can't tell
Planet Health	Yes	Yes	Can't tell	Can't tell	Can't tell	Can't tell	Can't tell	Yes	Yes	Yes	Yes	Yes	No	No	No	Can't tell	Can't tell
Fuel Up to Play 60	Yes	Yes	Yes	Yes	Can't tell	No	Can't tell	Yes	Yes	Yes	No	Yes	No	Yes	Can't tell	Can't tell	No
Students for Nutrition and eXercise (SNaX)	Yes	Yes	Yes	Can't tell	Yes	Yes	Can't tell	Yes	Yes	No	Can't tell	Can't tell	Yes	Yes	Yes	No	No
PLAY (promoting lifelong active youth) Zone (PZ)	Yes	Yes	Yes	Can't tell	Yes	Can't tell	Can't tell	Yes	No	Yes	No	No	Yes	Yes	Yes	Yes	Can't tell
QUANTITATIVE DESCRIPTIVE STUDIES
Action Schools! BC	Yes	Yes						Yes	Yes	Yes	No	Yes
Child and Adolescent Trial for Cardiovascular Health (CATCH)	Yes	Yes						Yes	Yes	Yes	No	Yes
NFL PLAY 60 FitnessGram®	Yes	Yes						Yes	Yes	Yes	Yes	Yes
Unnamed intervention	Yes	Yes						Yes	Can't tell	Yes	No	Yes
Exercise Your Options	Yes	Yes						Yes	Yes	Yes	No	Yes
Structured classroom physical activity programs	Yes	Yes						Yes	No	Yes	Yes	Yes
QUALITATIVE STUDIES
Marathon Kids	Yes	Yes	Yes	Yes	Yes	Yes	Yes
The Daily Mile	Yes	Yes	Yes	Yes	Yes	Yes	Yes
Apple Schools	Yes	Yes	Yes	Yes	Yes	Yes	Yes
